# Supplementary material
Source: publisher figshare collection journal article supplement (https://frontiersin.figshare.com/ndownloader/files/25711001)
Supplement: Supplementary file 1 [file 25711001]

## Sheet: Crayfish Trapping results
		Number of noble crayfish in each trap from different localities. Sampling year are given within the brackets.
Bæreia (2015)	Trap_number	Bæreia (2017)	N. Billingen (2015)	N. Billingen (2017)	S. Billingen (2015)	S. Billingen (2017)	Skårillen (2015)	Skårillen (2017)	Harestuvatnet (2015)	Gjerdingen (2015)	Steinsfjorden (2016)	Einafjorden (2016)
0	1	1	0	1	0	0	0	1	4	12	4	17
0	2	0	0	0	0	2	0	0	0	4	9	9
1	3	0	0	0	0	0	2	0	4	2	7	17
0	4	0	0	0	0	2	0	1	2	1	9	20
0	5	0	0	0	0	1	0	1	1	6	5	17
0	6	0	1	1	0	0	0	2	1	4	5	26
0	7	0	0	0	0	0	1	1	3	4	11	24
0	8	0	0	0	0	2	0	0	0	0	1	15
0	9	0	0	0	0	0	0	0	0	1	7	12
0	10	0	1	0	0	0	0	0	1	4	3	15
3	11	0	0	0	0	0	0	0	3	1	2	13
0	12	0	0	1	1	0	1	0	1	6	1	17
1	13	1	3	0	0	1	3	3	1	0	4	16
0	14	0	0	0	0	0	1	5	1	9	6	17
0	15	0	0	0	0	1	0	2	2	3	1	9
0	16	0	1	0	0	0	0	4	3	3	12	20
0	17	0	2	0	0	0	0	1	0	5	2	8
1	18	0	1	0	2	0	0	2	1	4	11	6
0	19	0	0	0	1	0	0	7	0	0	5	12
1	20	0	0	0	0	0	1	6	1	0	18	5
0	21	0	0	0	0	0	0	3	0	2	6	20
2	22	2	1	0	0	0	0	0	0	12	12	11
3	23	0	0	0	0	0	1	0	1	11	10	21
1	24	0	0	0	0	0	0	1	3	1	2	8
1	25	0	1	0	0	0	0	1	4	6	0	14
0	26	0	0	0	0	0	2	0	6	0	0	21
0	27	0	0	0	1	0	1	2	0	0	1	16
0	28	0	0	1	0	0	3	0	0	0	9	10
0	29	0	0	0	0	0	0	0	1	0	1	7
4	30	0	1	1	1	0	3	0	7	12	1	13
0	31	0	0	0	0	0	0	0	1	0	6	28
0	32	0	0	0	0	0	2	2	0	5	7	33
0	33	0	0	0	0	0	0	0	2	0	3	20
0	34	0	1	0	0	0	1	0	1	3	11	24
0	35	0	0	1	0	0	0	0	5	0	1	20
1	36	0	0	1	1	0	1	0	0	3	4	16
1	37	0	0	1	0	0	7	2	0	0	3	22
0	38	0	0	0	0	0	0	3	0	6	16	24
0	39	0	0	0	0	1	1	2	0	2	13	19
0	40	0	0	0	0	0	0	0	3	1	8	19
0	41	0	0	0	0	0	1	1	7	2	10	25
0	42	0	1	0	0	0	1	1	0	3	6	24
2	43	0	1	2	0	0	5	1	0	3	4	10
0	44	0	0	0	0	0	3	3	0	7	4	33
0	45	0	1	1	0	1	2	2	1	2	5	19
0	46	0	0	0	0	0	0	0	1	5	1	9
0	47	0	2	0	0	0	0	1	4	0	1	18
0	48	0	1	0	0	1	0	0	3	4	1	24
0	49	0	0	0	0	0	0	0	1	2		29
0	50	0	0	1	0	0	0	6	6	3		24
average	Average CPUE	0.08	0.38	0.24	0.14	0.24	0.86	1.34	1.72	3.28	5.60417	17.52
	Number of traps	50	50	50	50	50	50	50	50	50	48	50
